# Supplementary material
Source: PubMed Central journal article supplement (PMC3738820)
Supplement: mmc1.pdf [file mmc1.pdf]

## Supplemental Data

### miR-196a Ameliorates Phenotypes of Huntington Disease in Cell, Transgenic Mouse, and Induced Pluripotent Stem Cell Models

Pei-Hsun Cheng, Chia-Ling Li, Yu-Fan Chang, Shaw-Jeng Tsai, Yen-Yu Lai, Anthony W. S. Chan, Chuan-Mu Chen, and Shang-Hsun Yang

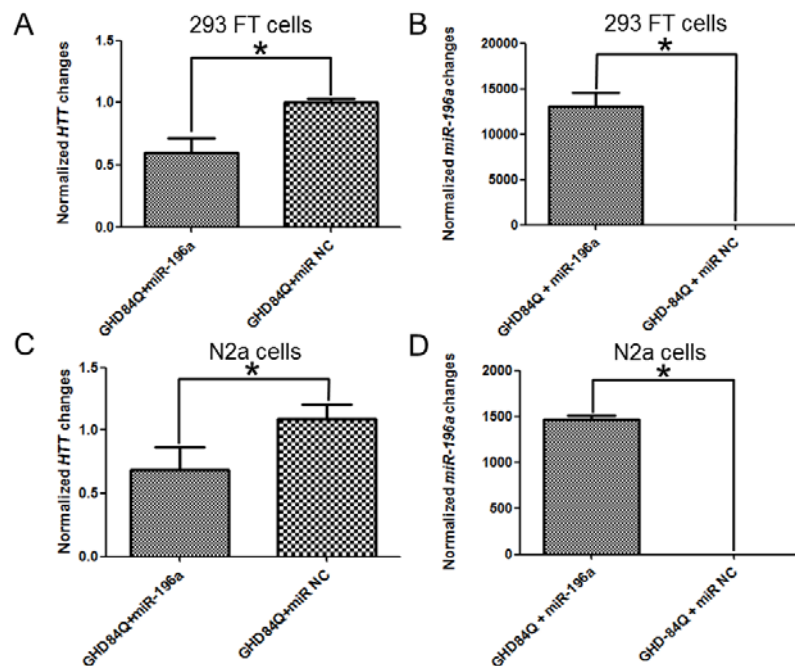

**Figure S1. RNA expression profiling of miR-196a and mutant *HTT* in 293 FT and N2a cells after the treatments of miR-196a mimics.** 293 FT (A and B) and N2a (C and D) cells were transfected with mutant *HTT* (GHD84Q), miR-196a mimics or miRNA unrelated control (miR NC), and then subjected for Q-RT-PCR (Applied Biosystems). (A and C) show the mRNA level of mutant *HTT* in 293 FT and N2a cells, respectively. (B and D) show the expression level of miR-196a in 293 FT and N2a cells, respectively. n=3, data represent mean  $\pm$  SD, and \* represents significant difference between two groups.

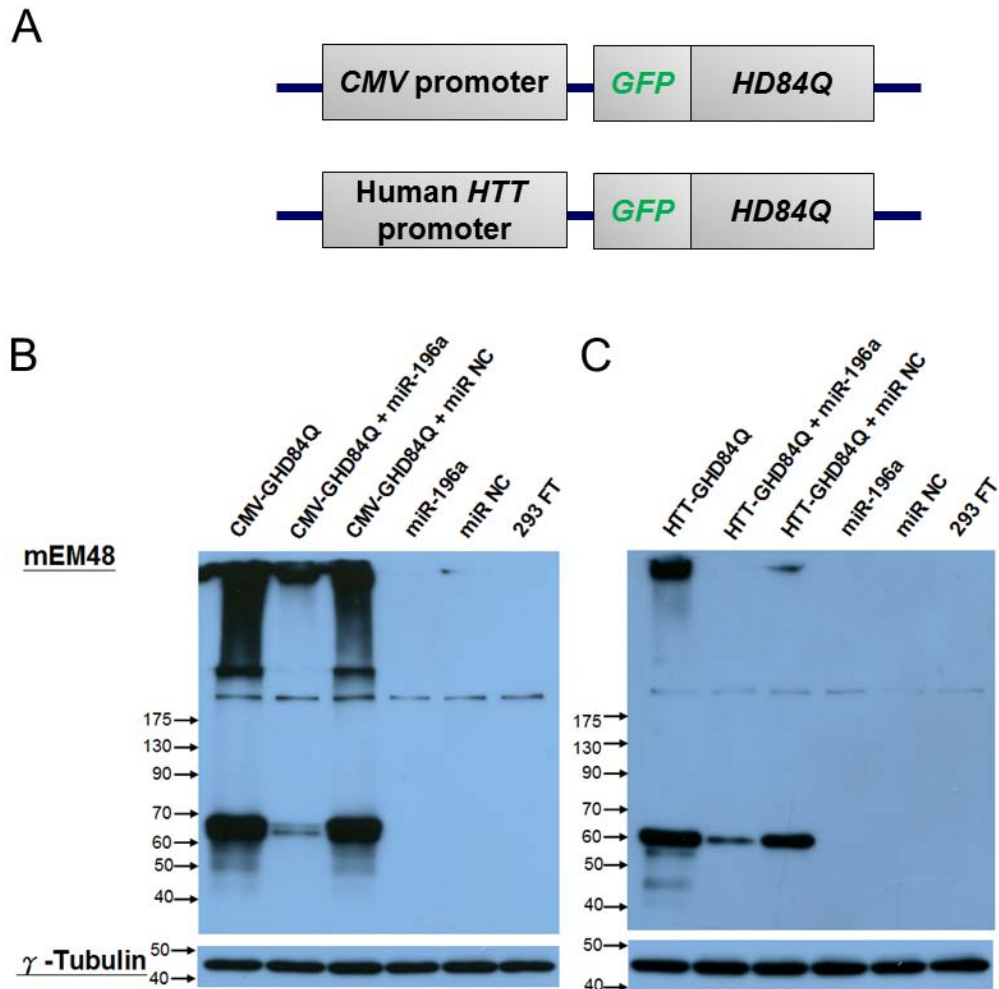

**Figure S2. miR-196a suppressed the expression of mutant *HTT* driven by different promoters *in vitro*.** (A) Top panel shows the mutant *HTT* construct containing the cytomegalovirus (CMV) promoter and mutant *HTT* with 84 CAG repeats (HD84Q) and GFP fusion protein. Bottom panel shows the mutant *HTT* construct containing the human endogenous *HTT* promoter, HD84Q and GFP fusion protein. (B) miR-196a mimics, unrelated controls (miR-NC) and mutant *HTT* driven by the CMV promoter (CMV-GHD84Q) were transfected into 293 FT cells, and then analyzed via Western blotting using mEM48 and  $\gamma$ -tubulin antibodies. Cells transfected with CMV-GHD84Q and miR-196a show lower expression level of mutant *HTT* compared to that of cells transfected with CMV-GHD84Q and miR-NC. (C) miR-196a mimics, unrelated controls (miR-NC) and mutant *HTT* driven by the human *HTT* promoter (HTT-GHD84Q) were used to perform the same experiment as described in (B). Cells transfected with HTT-GHD84Q and miR-196a also show lower expression level of mutant *HTT* compared to that of cells transfected with HTT-GHD84Q and miR-NC.

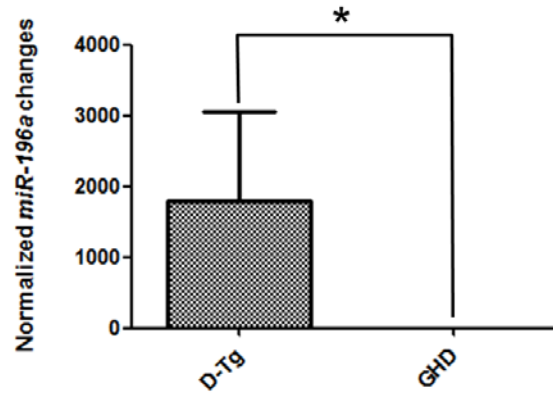

**Figure S3. Expression of miR-196a in the brain of D-Tg and GHD transgenic mice.** Brain tissues of different transgenic mice at one month of age (n=5-6 for each group) were subjected for Q-RT-PCR to detect the expression of miR-196a. Data represent mean  $\pm$  SD, \* represents significant difference between two groups.

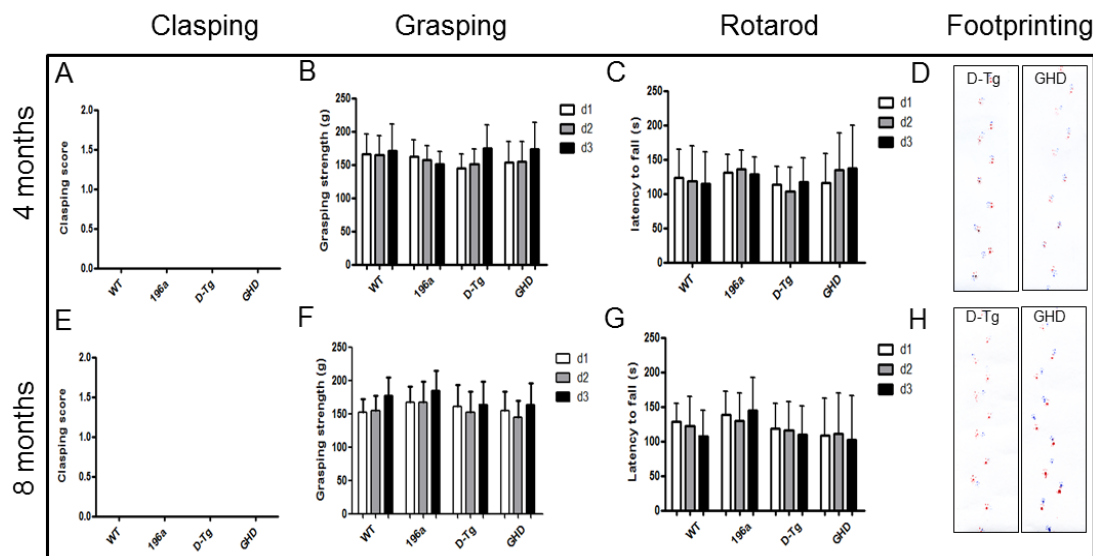

**Figure S4. Behavioral phenotypes in four groups of mice at four and eight months of ages.** Claspings (A, E), Grasping (B, F), Rotarod (C, G) and Footprinting (D, H) tests were performed at 4 (A-D) and 8 (E-H) months of age in four groups (n=6-9 mice for each group). Data represent mean  $\pm$  SD.

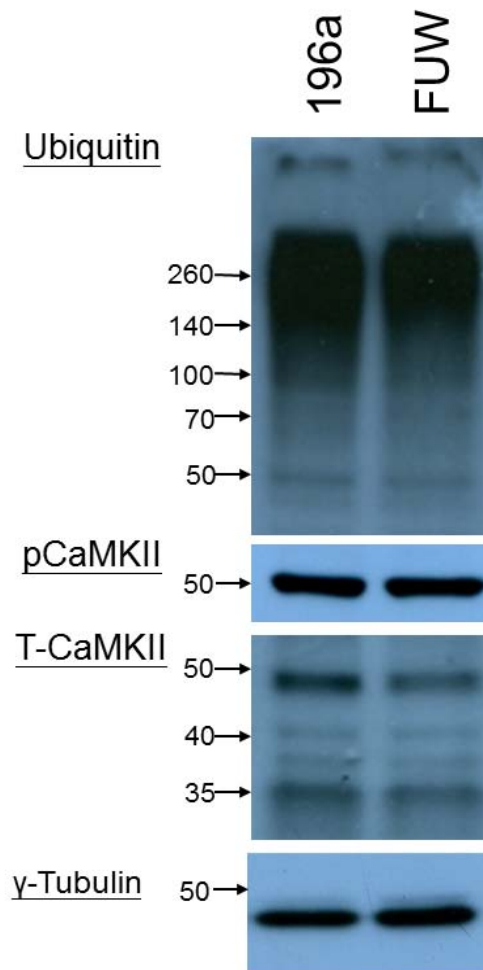

**Figure S5. Expression of Ubiquitin and CaMKII in HD-iPSCs.** Western blotting using the same membrane in Figure 4E immunoblotted with ubiquitin, pCaMKII and total CaMKII antibodies, showing stronger ubiquitin and total CaMKII in miR-196a infected HD-iPSCs, whereas similar signal of pCaMKII is observed between these two groups.  $\gamma$ -tubulin is used as an internal control.

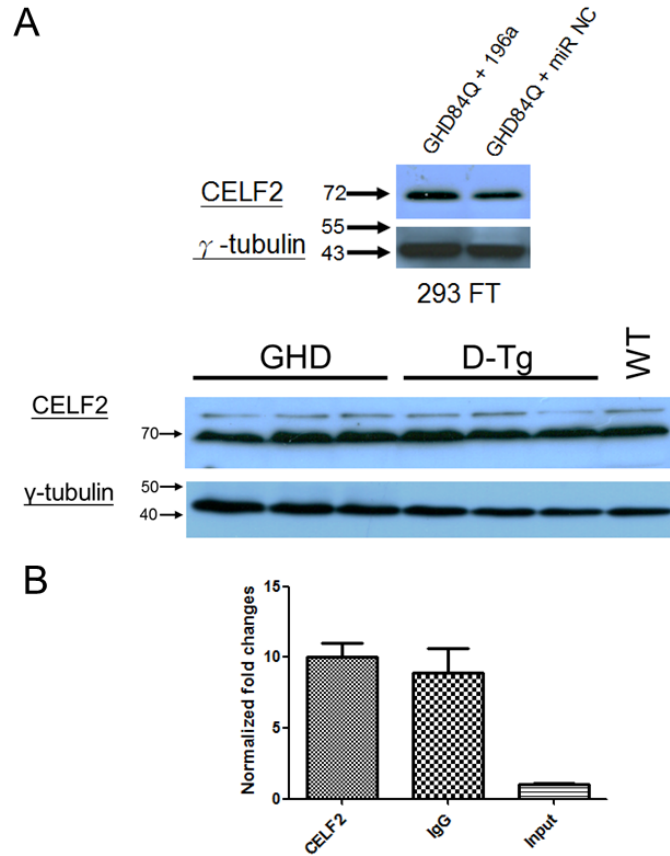

**Figure S6. CELF2 does not involve in the mechanism of miR-196a on HD.** (A) Top panel shows the Western blotting result revealing similar expression level of CELF2 between HD 293 FT cells transfected with miR-196a mimics and unrelated (NC) controls. Bottom panel is the Western blotting result revealing similar level of CELF2 in the brain samples of GHD and D-Tg transgenic mice.  $\gamma$ -tubulin was used as the internal control. (B) Real-time RT-PCR performed after RNA immunoprecipitation using a CELF2 antibody in 293 FT cells showed similar binding ability of a CELF2 antibody compared to that of IgG control. Data represent mean  $\pm$  SD (n=3).

**Table S1. Candidate genes involved in CaMKII-CREB, inflammatory response in brain and ubiquitin-dependent protein catabolic process pathways. miR-196a TargetScan genes and miR-196a microarray genes were imported into the MetaCore online software, and candidate genes related to three pathways are listed.**

| CaMK II-CREB pathway      |               |                         |         | Pathway of inflammatory response in brain |           |                         |         | Pathway of ubiquitin-dependent protein catabolic process |           |                         |         |        |
|---------------------------|---------------|-------------------------|---------|-------------------------------------------|-----------|-------------------------|---------|----------------------------------------------------------|-----------|-------------------------|---------|--------|
| miR-196a targetscan genes |               | miR-196a microarray     |         | miR-196a targetscan genes                 |           | miR-196a microarray     |         | miR-196a targetscan genes                                |           | miR-196a microarray     |         |        |
| Input IDs                 | Input IDs     | Fold change (D-1g /GHD) | p-value | Input IDs                                 | Input IDs | Fold change (D-1g /GHD) | p-value | Input IDs                                                | Input IDs | Fold change (D-1g /GHD) | p-value |        |
| CALM3;CALM1               | 0610040J01Rik | -1.29                   | 0.0131  | EPHA3                                     |           | Ahey                    | -1.204  | 0.012                                                    | NEDD4L    | Neadd4;Rrp1             | -1.30   | 0.0369 |
| COL24A1                   | 1700026L06Rik | -1.19                   | 0.0067  |                                           |           | Almp1                   | -1.180  | 0.006                                                    | RNF5      | Rnf5                    | -1.18   | 0.0254 |
| HABP4                     | 5730577I03Rik | -1.15                   | 0.0221  |                                           |           | Akt1                    | -1.240  | 0.047                                                    | USP15     | Usp15                   | -1.23   | 0.0256 |
|                           | Acdy3         | -1.21                   | 0.0031  |                                           |           | Bgaln1                  | -1.169  | 0.003                                                    | CDC34     | A1314180                | -1.33   | 0.0115 |
|                           | Aldh6a1       | -1.23                   | 0.0055  |                                           |           | Bmp2                    | -1.198  | 0.023                                                    | ERLIN2    | Amir                    | -1.35   | 0.0415 |
|                           | Atp2a2        | -1.21                   | 0.0443  |                                           |           | Blk                     | -1.069  | 0.031                                                    | MAP3K1    | Anapc2                  | -1.15   | 0.0414 |
|                           | Bag3          | -1.25                   | 0.0469  |                                           |           | Ccl5                    | -3.236  | 0.021                                                    | RAD23B    | Birc3                   | -1.21   | 0.0194 |
|                           | Casp2         | -1.23                   | 0.0078  |                                           |           | Cd24a                   | -1.295  | 0.001                                                    | SMURF1    | Birc                    | -1.36   | 0.0332 |
|                           | Ctnc3         | -1.31                   | 0.0336  |                                           |           | Ce1pa                   | -1.221  | 0.042                                                    | UBE2G2    | Cdzap                   | -1.47   | 0.0051 |
|                           | Ctla          | -1.43                   | 0.0444  |                                           |           | Cela1                   | -1.512  | 0.040                                                    | USP31     | Cul1                    | -1.27   | 0.0032 |
|                           | Cnn1          | -2.43                   | 0.0420  |                                           |           | Cnr2                    | -1.388  | 0.004                                                    | YOD1      | Cul3                    | -1.41   | 0.0167 |
|                           | Cnr2          | -1.39                   | 0.0040  |                                           |           | Crcp                    | -1.166  | 0.029                                                    |           | Derl2                   | -1.21   | 0.0112 |
|                           | D230025D16Rik | -1.26                   | 0.0067  |                                           |           | Csf1                    | -1.165  | 0.036                                                    |           | DnaIb9                  | -1.31   | 0.0014 |
|                           | Dpysl2        | -1.25                   | 0.0600  |                                           |           | Csf1r                   | -1.231  | 0.007                                                    |           | Edem3                   | -1.31   | 0.0263 |
|                           | Gria1         | -1.14                   | 0.0340  |                                           |           | Cyba                    | -1.185  | 0.002                                                    |           | Fbxw11                  | -1.28   | 0.0011 |
|                           | Hctc1r1       | -1.19                   | 0.0338  |                                           |           | F12                     | -1.315  | 0.002                                                    |           | Herpud1                 | -1.22   | 0.0256 |
|                           | Map3k7        | -1.26                   | 0.0069  |                                           |           | F8                      | -1.126  | 0.008                                                    |           | Huwe1                   | -1.23   | 0.0404 |
|                           | Mbd31         | -1.26                   | 0.0355  |                                           |           | Fcer1g                  | -1.194  | 0.045                                                    |           | Itch                    | -1.19   | 0.0403 |
|                           | Ncor2         | -1.29                   | 0.0105  |                                           |           | Hif1a                   | -1.382  | 0.031                                                    |           | Katd10                  | -1.43   | 0.0140 |
|                           | Nf5dcl1       | -1.25                   | 0.0205  |                                           |           | Lias                    | -1.326  | 0.011                                                    |           | Mdm2                    | -1.32   | 0.0162 |
|                           | Rnf146        | 1.24                    | 0.0325  |                                           |           | Lipa                    | -1.317  | 0.018                                                    |           | Pebp2                   | -1.46   | 0.0367 |
|                           | Sic39a1       | -1.34                   | 0.0287  |                                           |           | Map2k3                  | -1.405  | 0.046                                                    |           | C6Psmat7                | -1.34   | 0.0120 |
|                           | Smap4         | -1.32                   | 0.0230  |                                           |           | Mecom                   | -1.166  | 0.034                                                    |           | Psmc2                   | -1.27   | 0.0369 |
|                           | Sympo         | -1.35                   | 0.0203  |                                           |           | Myd88                   | -1.278  | 0.013                                                    |           | Psmc5                   | -1.16   | 0.0373 |
|                           | Sympo         | -1.35                   | 0.0203  |                                           |           | Naf1                    | -1.300  | 0.015                                                    |           | Rbbp6                   | -1.23   | 0.0074 |
|                           | Tpad52        | -1.39                   | 0.0393  |                                           |           | Ncf1                    | -1.286  | 0.033                                                    |           | Rnf20                   | -1.18   | 0.0187 |
|                           | Ubxn7         | -1.23                   | 0.0057  |                                           |           | Notch1                  | -1.398  | 0.040                                                    |           | Sirt2                   | -1.14   | 0.0005 |
|                           | Usp13         | -1.27                   | 0.0117  |                                           |           | Park7                   | -1.280  | 0.034                                                    |           | Tnfrap1                 | -1.32   | 0.0203 |
|                           | Xrcc1         | -1.19                   | 0.0132  |                                           |           | Pgd                     | -1.275  | 0.003                                                    |           | Trim13                  | -1.27   | 0.0227 |
|                           | Yipf2         | -1.22                   | 0.0481  |                                           |           | Plser1                  | -1.170  | 0.032                                                    |           | Trpc4ap                 | -1.25   | 0.0359 |
|                           |               |                         |         |                                           |           | Ptrf                    | -1.105  | 0.024                                                    |           | Ube2a3                  | -1.21   | 0.0419 |
|                           |               |                         |         |                                           |           | Pxx                     | -1.148  | 0.036                                                    |           | Ube2w                   | -1.26   | 0.0075 |
|                           |               |                         |         |                                           |           | Reg3a                   | -1.123  | 0.025                                                    |           | Ube3a                   | -1.30   | 0.0284 |
|                           |               |                         |         |                                           |           | Scyl1                   | -1.354  | 0.024                                                    |           | Usp14                   | -1.39   | 0.0019 |
|                           |               |                         |         |                                           |           | Serpina3n               | -1.428  | 0.040                                                    |           | Usp18                   | -2.05   | 0.0469 |
|                           |               |                         |         |                                           |           | Serpinp9                | -1.237  | 0.049                                                    |           | Usp22                   | -1.32   | 0.0096 |
|                           |               |                         |         |                                           |           | Serpint2                | -1.113  | 0.036                                                    |           | Usp39                   | -1.26   | 0.0085 |
|                           |               |                         |         |                                           |           | Smad1                   | -1.324  | 0.047                                                    |           | Usp4                    | -1.17   | 0.0362 |
|                           |               |                         |         |                                           |           | Tfrc                    | -1.214  | 0.044                                                    |           |                         |         |        |
|                           |               |                         |         |                                           |           | Thbs1                   | -1.638  | 0.037                                                    |           |                         |         |        |
|                           |               |                         |         |                                           |           | Tir7                    | -1.255  | 0.035                                                    |           |                         |         |        |
|                           |               |                         |         |                                           |           | Tnf                     | -1.459  | 0.020                                                    |           |                         |         |        |
|                           |               |                         |         |                                           |           | Tnfrsf1a                | -1.259  | 0.011                                                    |           |                         |         |        |
